# Supplementary material for: Vanadium bromoperoxidase (VBrPO) mimics: synthesis, structure and a comparative account of the catalytic activity of newly synthesized oxidovanadium and oxido-peroxidovanadium complexes
Source: Royal Society of Chemistry journal article supplement (doi:10.1039/c6nj00767h), 2016-01-01
Supplement: c6nj00767h1.pdf [file c6nj00767h1.pdf]

**Vanadium bromoperoxidase (VBrPO) mimics: Synthesis, structure and comparative account of the catalytic activity of newly synthesized oxido vanadium and oxido-peroxido vanadium complexes**

Eshita Palmajumder, Swarup Patra, Michael G. B. Drew and Kalyan K. Mukherjea

**Supplementary files:**

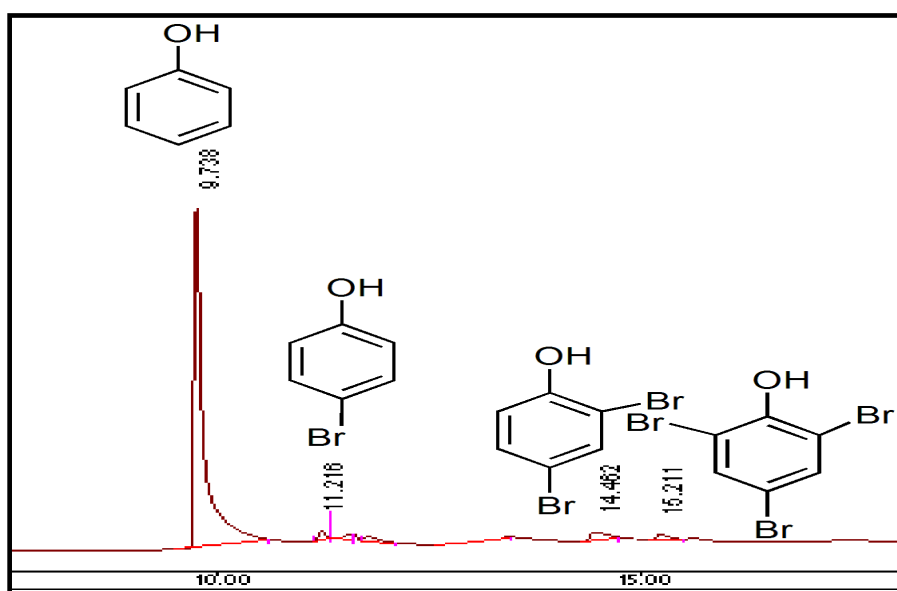

**Fig.S1:** Retention time of the brominated products including the substrate phenol in the gas chromatogram with catalyst 1.

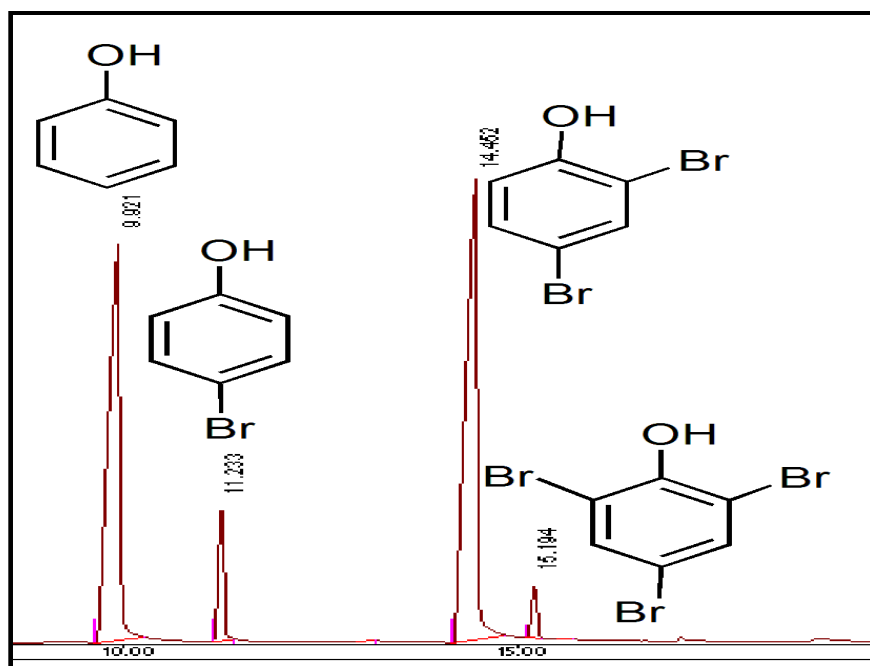

**Fig.S2:** Retention time of the brominated products including the substrate phenol in the gas chromatogram with catalyst 2.

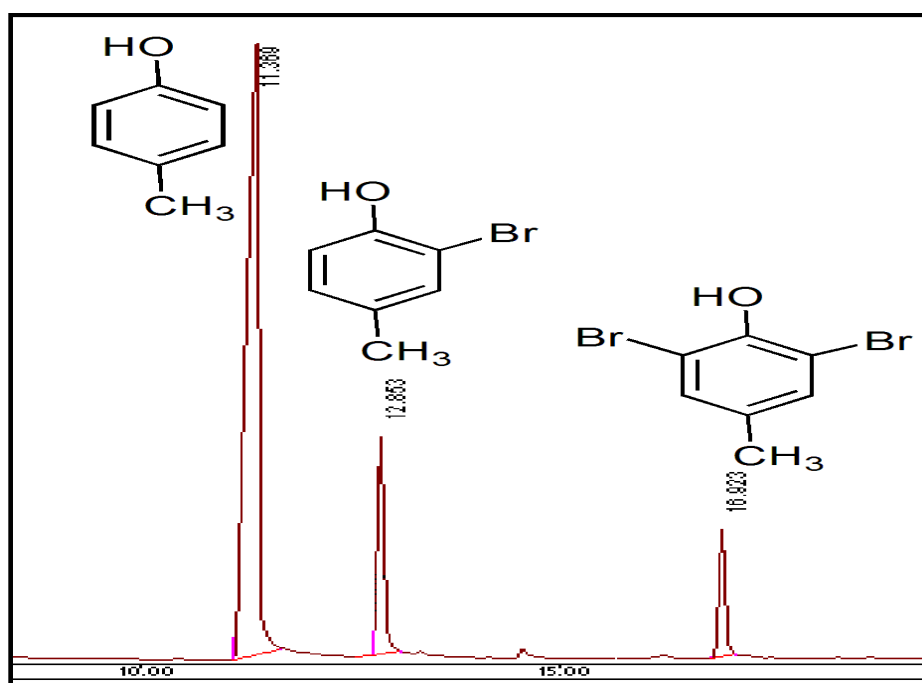

**Fig.S3:** Retention time of the brominated products including the substrate *p*-cresol in the gas chromatogram with catalyst 1.

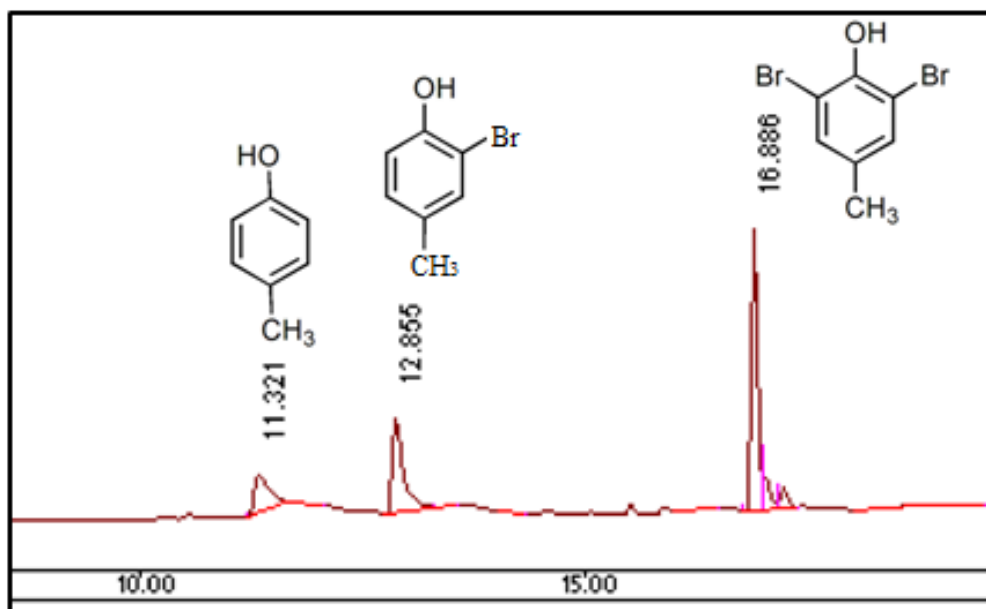

**Fig.S4:** Retention time of the brominated products including the substrate *p*-cresol in the gas chromatogram with catalyst 2.

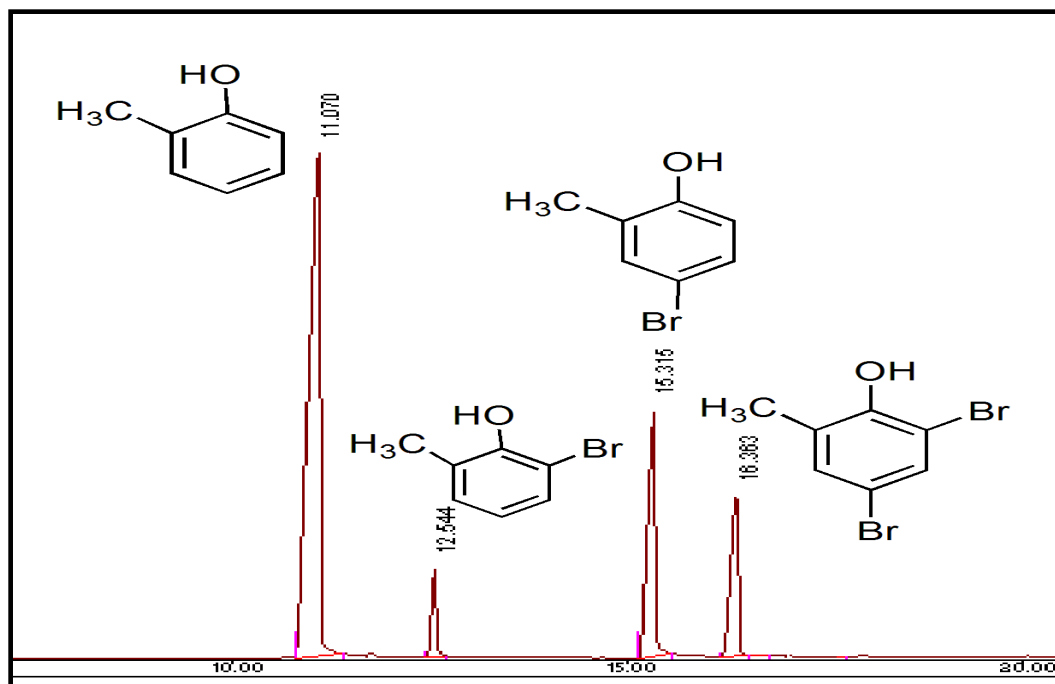

**Fig.S5:** Retention time of the brominated products including the substrate *o*-cresol in the gas chromatogram with catalyst 1.

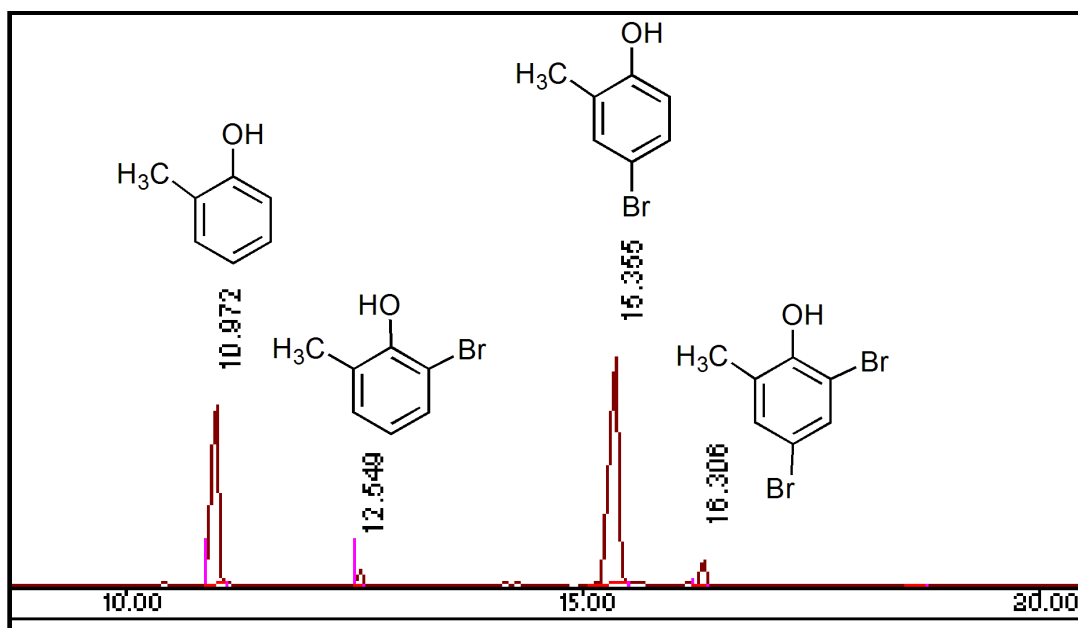

**Fig.S6:** Retention time of the brominated products including the substrate *o*-cresol in the gas chromatogram with catalyst 2.

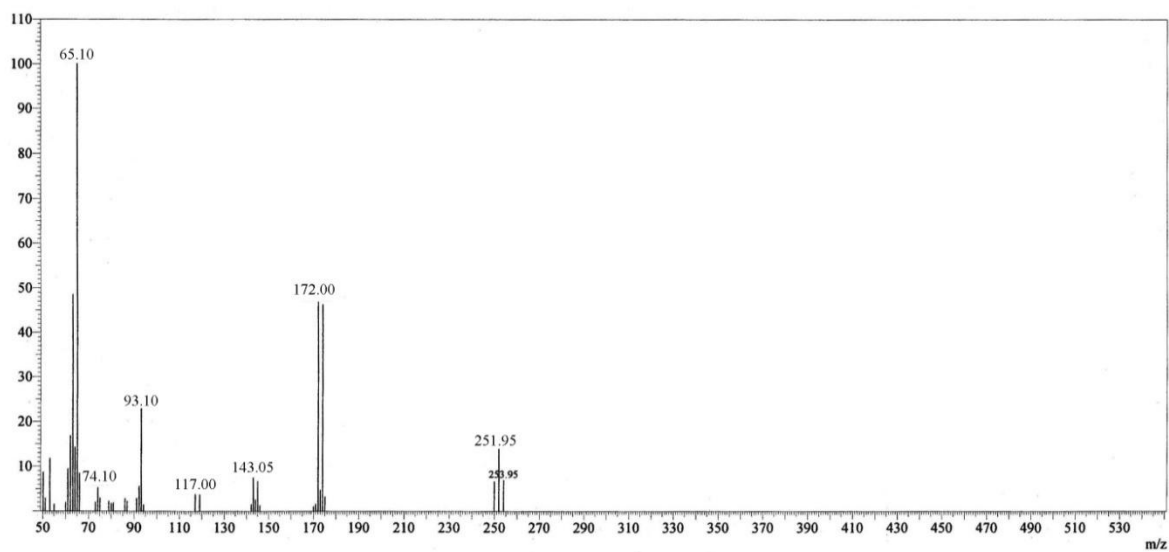

**Fig.S7:** Mass spectrum of 4-bromo phenol.

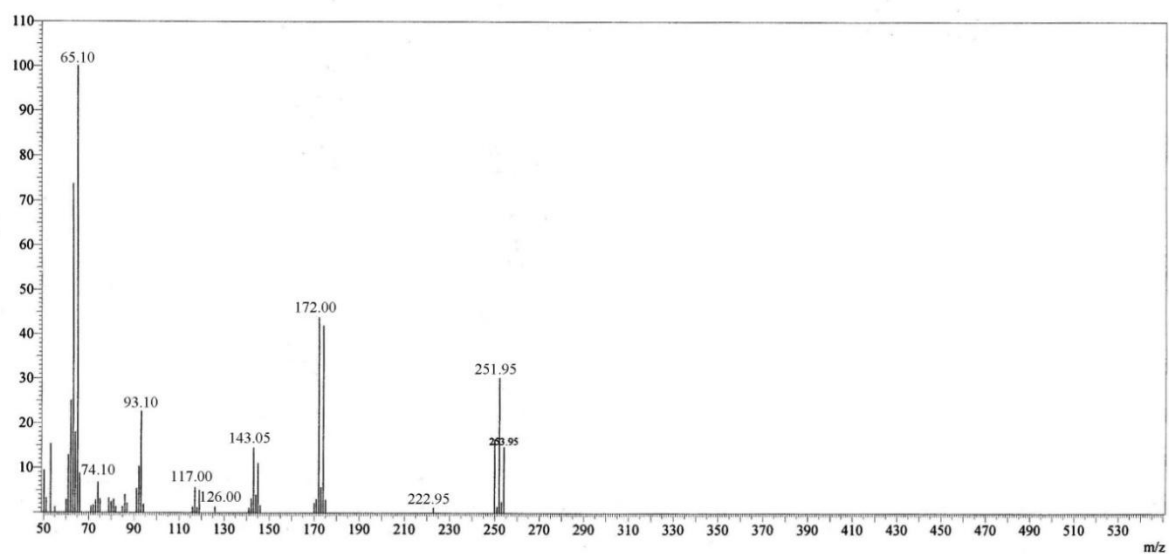

**Fig.S8:** Mass spectrum of 2, 4-dibromophenol.

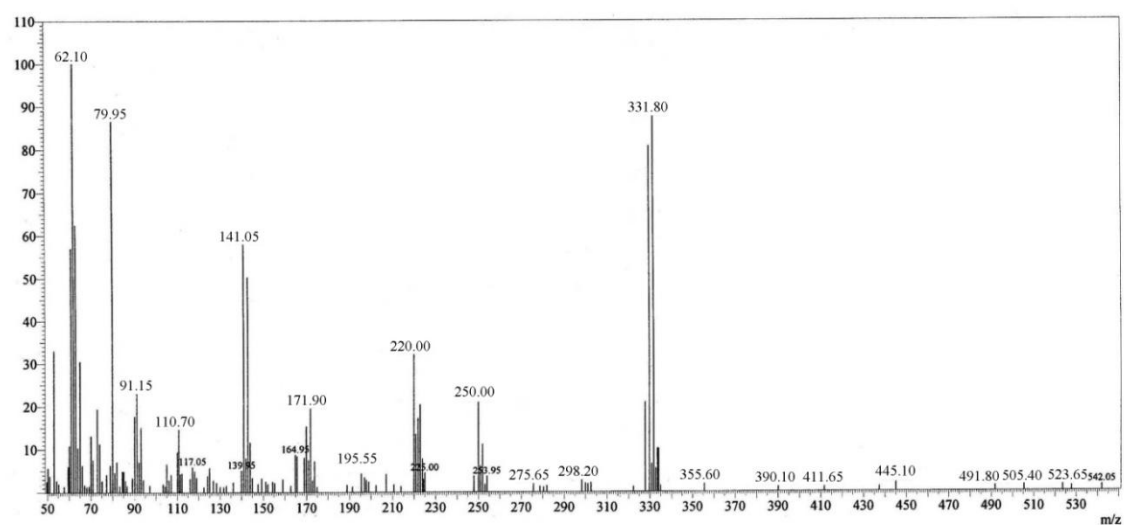

**Fig.S9:** Mass spectrum of 2, 4, 6-tribromophenol.

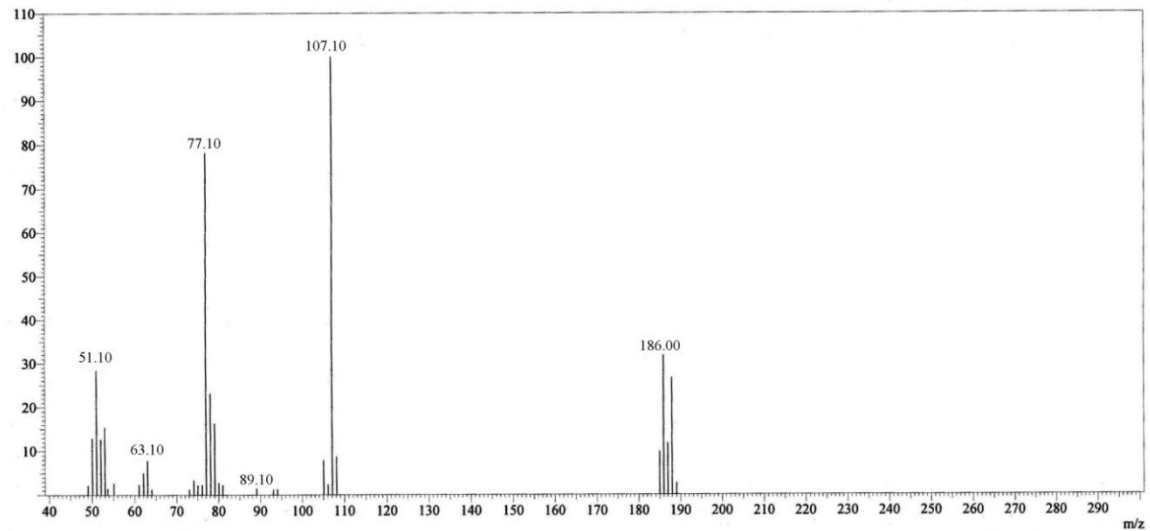

**Fig.S10:** Mass spectra of 2-bromo *p*-cresol.

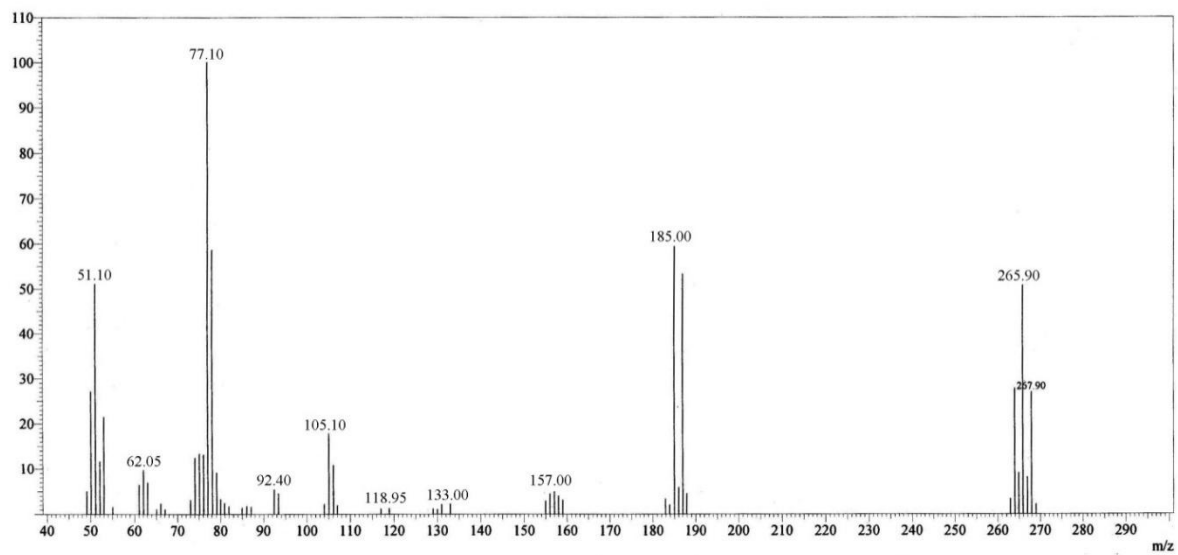

**Fig.S11:** Mass spectrum of 2,6-dibromo *p*-cresol.

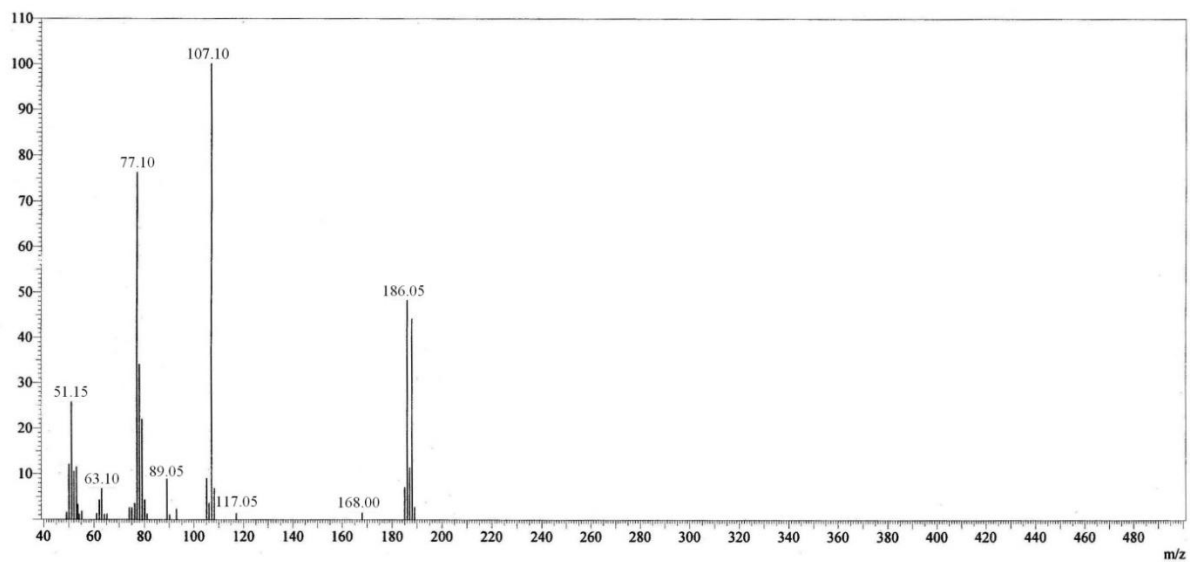

**Fig.S12:** Mass spectrum of 2- bromo *o*-cresol.

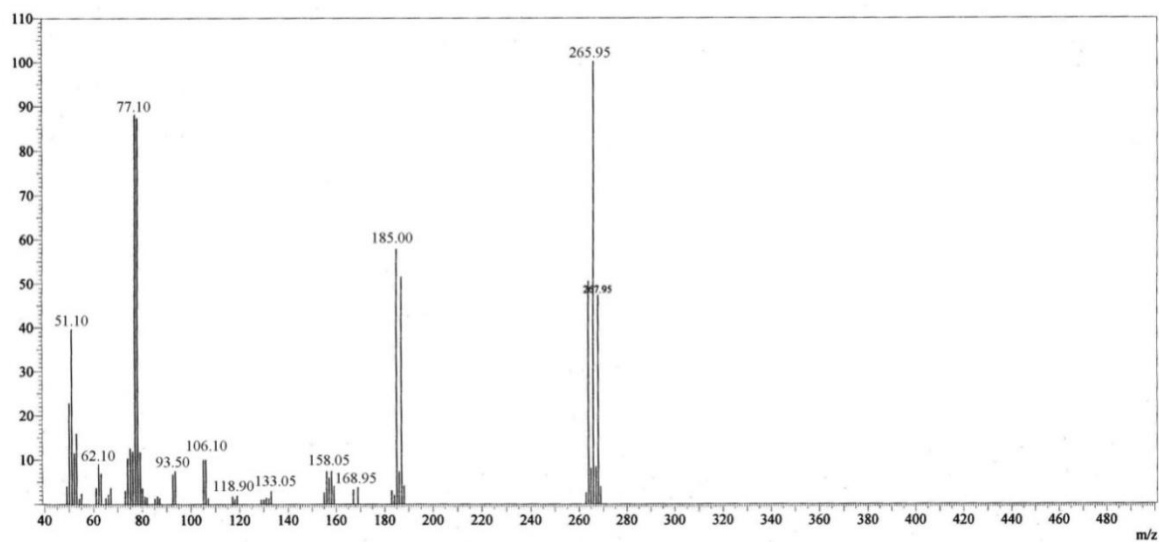

**Fig.S13:** Mass spectrum of 2, 4-dibromo *o*-cresol.

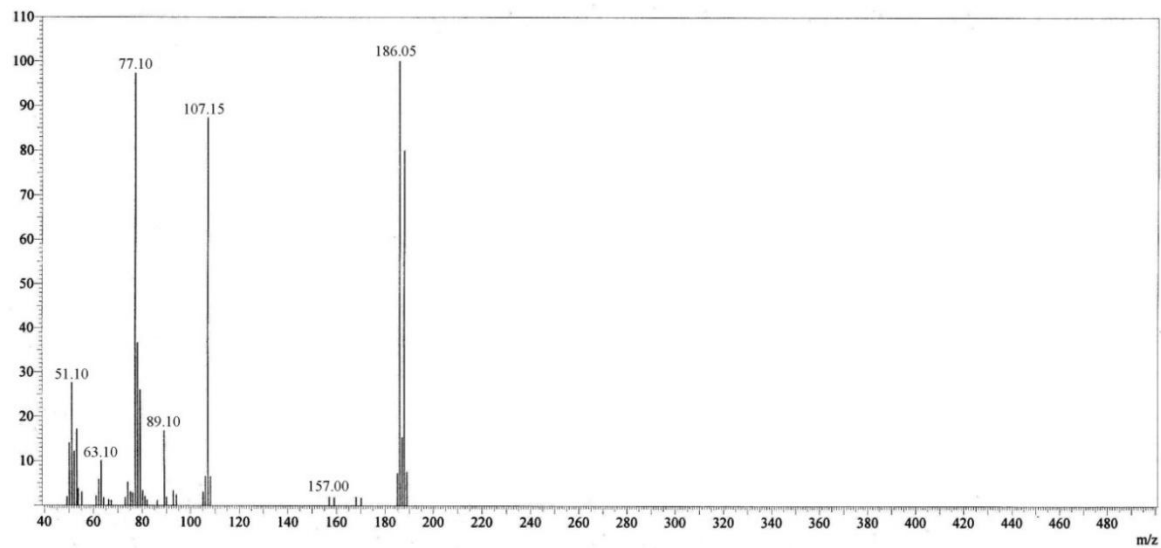

**Fig.S14:** Mass spectrum of 4-bromo *o*-cresol.
